# Supplementary material
Source: Springer Nature journal article supplement (https://www.springermedizin.de/resource/supplementary/12931_2012_1241_MOESM3_ESM.pdf/9425826)

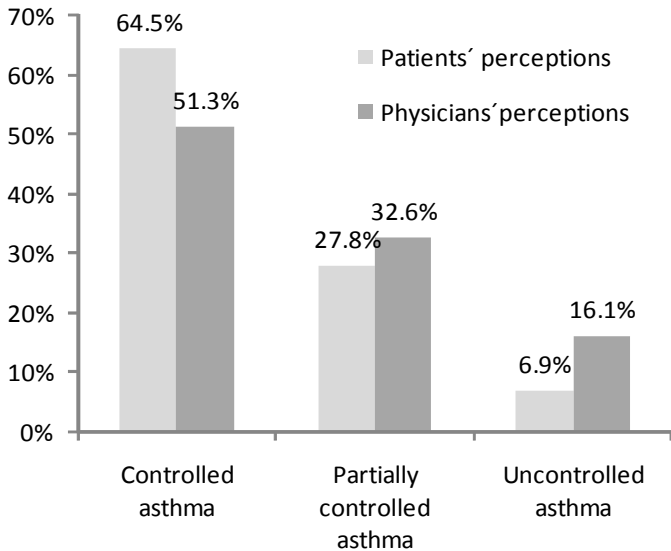

K= 0.53

Supplement: MOESM3 [file 9425826]
